# Supplementary material for: Mutations in respiratory complex I promote antibiotic persistence through alterations in intracellular acidity and protein synthesis
Source: PubMed Central journal article supplement (PMC8795404; doi:10.1038/s41467-022-28141-x), 2022-01-27
Supplement: 41467_2022_28141_MOESM1_ESM.pdf [file 41467_2022_28141_MOESM1_ESM.pdf]

1 SUPPLEMENTARY INFORMATION

2 Mutations in respiratory complex I promote antibiotic persistence  
3 through alterations in intracellular acidity and protein synthesis

4 Bram Van den Bergh<sup>1,2,3</sup>, Hannah Schramke<sup>4</sup>, Joran Elie Michiels<sup>1,2</sup>, Tom E.P. Kimkes<sup>4</sup>, Jakub Leszek  
5 Radzikowski<sup>4</sup>, Johannes Schimpf<sup>5</sup>, Silke R. Vedelaar<sup>4</sup>, Sabrina Burschel<sup>5</sup>, Liselot Dewachter<sup>1,2</sup>, Nikola  
6 Lončar<sup>6</sup>, Alexander Schmidt<sup>7</sup>, Tim Meijer<sup>4</sup>, Maarten Fauvart<sup>1,2,8</sup>, Thorsten Friedrich<sup>5</sup>, Jan  
7 Michiels<sup>1,2,9\*</sup>, Matthias Heinemann<sup>4,9\*</sup>

8

## 9 Supplementary Tables

10 *Supplementary Table 1: Mutations found in randomly selected clones from evolved E. coli populations.*

| Clone <sup>1</sup>   | Genomic location <sup>2</sup> | Type of mutation | Reference       | Allele | Gene            | Amino acid change |
|----------------------|-------------------------------|------------------|-----------------|--------|-----------------|-------------------|
| AMK-1-1 <sup>3</sup> | 1303437                       | SNV              | C               | A      | <i>oppB</i>     | Ala180Glu         |
| AMK-1-2              | 1303437                       | SNV              | C               | A      | <i>oppB</i>     | Ala180Glu         |
| AMK-1-3              | 1303437                       | SNV              | C               | A      | <i>oppB</i>     | Ala180Glu         |
| AMK-1-4              | 1303437                       | SNV              | C               | A      | <i>oppB</i>     | Ala180Glu         |
| AMK-1-5              | 1569851                       | Insertion        | -               | AAT    | <i>gadC</i>     | Ser213SerTyr      |
| AMK-2-1 <sup>3</sup> | 2390302                       | SNV              | C               | G      | <i>nuoN</i>     | Gly402Arg         |
| AMK-2-2              | 3438087                       | SNV              | G               | A      | <i>mscL</i>     | Gly22Ser          |
| AMK-2-3              | 1303437                       | SNV              | C               | A      | <i>oppB</i>     | Ala180Glu         |
| AMK-2-4              | 1303437                       | SNV              | C               | A      | <i>oppB</i>     | Ala180Glu         |
| AMK-2-5              | 1303437                       | SNV              | C               | A      | <i>oppB</i>     | Ala180Glu         |
| AMK-3-1              | 1303437                       | SNV              | C               | A      | <i>oppB</i>     | Ala180Glu         |
| AMK-4-1              | 823950                        | SNV              | G               | A      | <i>ybhP</i>     | Ala183Asp         |
| AMK-4-1              | 1303437                       | SNV              | C               | A      | <i>oppB</i>     | Ala180Glu         |
| AMK-5-1              | 3438102                       | Insertion        | -               | GGT    | <i>mscL</i>     | Ala27GlyAla       |
| AMK-6-1 <sup>3</sup> | 1569390                       | SNV              | A               | G      | <i>gadC</i>     | Phe367Ser         |
| AMK-7-1              | 2390616                       | SNV              | A               | C      | <i>nuoN</i>     | Leu297Arg         |
| AMK-8-1              | 45934                         | SNV              | A               | C      | <i>yaaU</i>     | Gln43Pro          |
| AMK-8-1              | 3149003                       | SNV              | C               | A      | <i>yqhA</i>     | Asp157Tyr         |
| AMK-9-1              | 1569858-<br>1569872           | Deletion         | ATGAAGGCAACAAAT | -      | <i>gadC</i>     | Phe207_Ile211del  |
| AMK-10-1             | 722427                        | SNV              | A               | C      | <i>kdpD</i>     | Ile663Ser         |
| AMK-10-1             | 1303437                       | SNV              | C               | A      | <i>oppB</i>     | Ala180Glu         |
| KAN-1-1              | 2394166                       | SNV              | G               | T      | <i>nuoL</i>     | Ala294Asp         |
| TOB-1-1 <sup>4</sup> | 1569375-<br>1569380           | Deletion         | GCCAGT          | -      | <i>gadC</i>     | Ala372_Leu373del  |
| GEN-1-1 <sup>4</sup> | 2390577                       | SNV              | A               | C      | <i>nuoN</i>     | Leu310Arg         |
| UTI-1-1              | 2524117                       | SNV              | A               | C      | <i>nuoM</i>     | Phe356Cys         |
| UTI-1-2              | 2524117                       | SNV              | A               | C      | <i>nuoM</i>     | Phe356Cys         |
| UTI-2-1              | 2523412                       | SNV              | A               | C      | <i>nuoN</i>     | Leu79Arg          |
| UTI-3-1              | 2523942                       | SNV              | G               | T      | <i>nuoM</i>     | Ser414Arg         |
| UTI-3-1              | 3058278                       | SNV              | T               | G      | <i>YP542126</i> | Asn65Glu          |

11 In total, 23 clones were assessed by whole-genome sequencing. In total we found 29 mutations in 11 different genes. The  
12 limited number of mutations per clone (1 or 2) agrees with the limited evolutionary time (<100 generations) and the good fit  
13 of a model for the spread of one mutant in a wild-type background to the evolutionary changes (see Supplementary Fig. 1a,  
14 and Fig. 1 in Van den Bergh *et al.*, 2016<sup>1</sup>). 19 mutations are unique with a single mutation in *oppB* reoccurring in multiple  
15 clones. Respectively 4 and 3 clones from the first and second amikacin-evolved population harbor the same mutation in *oppB*  
16 (Supplementary Data 1). The same mutation is found in other independent amikacin evolved clones and in 12 populations in  
17 total (Supplementary Fig. 1b). Additionally, *mscL* and *gadC* also qualify as strong evolutionary targets as respectively 2 and 4  
18 different alleles of the genes were found, each in different populations. Most interesting are mutations that accumulated in *nuo*.  
19 In total, 8 clones contained a mutation in *nuoLM* or *N*, both in the lab strain and in the UTI89 background and throughout

20 samples from 3 out of 4 aminoglycosides. It is important to note that none of these alleged targets were found to be mutated  
21 together in the same clonal background.

22 <sup>1</sup>Naming is as follows: the first abbreviation denotes the antibiotic that was used during the evolution experiments, the first  
23 number indicates the population of origin and the last number is the clone identifier.

24 <sup>2</sup>Location with regards to the used references, either *E. coli* K12 MG1655 NC\_000913.3 or *E. coli* UTI89 NC\_007946.1  
25 (genome) and NC\_007941.1 (plasmid).

26 <sup>3</sup>These samples were analyzed and published before by Van den Bergh et al., 2016<sup>1</sup> but are included here for comparison.

27 <sup>4</sup>While genotype information of most clones was obtained by whole-genome-sequencing using Illumina Technology, data for  
28 these clones come from targeted resequencing through Sanger's technology.

29

| Gene | Residue <sup>1</sup> | AA reference <sup>1</sup> | AA variant | # populations | cum freq | Hydrophilic change <sup>2</sup> ? | Transmembrane section <sup>3</sup> ? |
|------|----------------------|---------------------------|------------|---------------|----------|-----------------------------------|--------------------------------------|
| nuoA | 73                   | Met                       | Lys        | 2             | 3.53     | 1                                 | 1                                    |
| nuoA | 78                   | Phe                       | Ser        | 2             | 2.66     | 1                                 | 1                                    |
| nuoA | 85                   | Leu                       | Arg        | 1             | 15.56    | 1                                 | 1                                    |
| nuoB | 70                   | Thr                       | Ala        | 1             | 1.01     | 0                                 | 0                                    |
| nuoB | 82                   | Gly                       | Ser        | 1             | 1.26     | 1                                 | 0                                    |
| nuoC | 200                  | Trp                       | Gly        | 1             | 1.35     | 1                                 | 0                                    |
| nuoG | 404                  | Met                       | Arg        | 1             | 1.19     | 1                                 | 0                                    |
| nuoG | 567                  | Leu                       | Val        | 1             | 1.56     | 1                                 | 0                                    |
| nuoG | 588                  | Pro                       | fs         | 1             | 1.41     | -                                 | 0                                    |
| nuoH | 40                   | Leu                       | Arg        | 1             | 10.74    | 1                                 | 0                                    |
| nuoJ | 54                   | Leu                       | Arg        | 2             | 30.22    | 1                                 | 1                                    |
| nuoJ | 149                  | Leu                       | Arg        | 1             | 1.09     | 1                                 | 1                                    |
| nuoK | 28                   | Leu                       | Arg        | 3             | 16.34    | 1                                 | 1                                    |
| nuoK | 67                   | Ser                       | Arg        | 1             | 45.26    | 1                                 | 1                                    |
| nuoK | 77                   | Leu                       | fs         | 1             | 1.10     | -                                 | 1                                    |
| nuoL | 98                   | Leu                       | His        | 1             | 1.26     | 1                                 | 1                                    |
| nuoL | 171                  | Phe                       | fs         | 1             | 2.52     | -                                 | 1                                    |
| nuoL | 239                  | Leu                       | Arg        | 1             | 1.13     | 1                                 | 0                                    |
| nuoL | 290                  | Thr                       | Met        | 1             | 1.23     | 0                                 | 1                                    |
| nuoL | 294                  | Ala                       | Asp        | 1             | 2.62     | 1                                 | 1                                    |
| nuoL | 417                  | Ala                       | Ser        | 1             | 1.33     | 1                                 | 1                                    |
| nuoL | 418                  | Gly                       | Val        | 1             | 1.65     | 0                                 | 1                                    |
| nuoL | 421                  | Gly                       | Asp        | 1             | 1.45     | 1                                 | 1                                    |
| nuoL | 423                  | Phe                       | Ser        | 1             | 1.53     | 1                                 | 1                                    |
| nuoM | 190                  | Leu                       | Arg        | 1             | 5.97     | 1                                 | 1                                    |
| nuoM | 247                  | Ala                       | Glu        | 1             | 2.43     | 1                                 | 0                                    |
| nuoM | 316                  | Ala                       | Asp        | 1             | 1.66     | 1                                 | 1                                    |
| nuoM | 337                  | Ala                       | Val        | 1             | 1.37     | 0                                 | 0                                    |
| nuoM | 342                  | Val                       | Glu        | 5             | 129.78   | 1                                 | 0                                    |
| nuoM | 356                  | Phe                       | Cys        | 6             | 205.36   | 1                                 | 1                                    |
| nuoM | 356                  | Phe                       | Ser        | 2             | 6.15     | 1                                 | 1                                    |
| nuoM | 414                  | Ser                       | Arg        | 1             | 11.72    | 1                                 | 0                                    |
| nuoN | 26                   | Leu                       | Arg        | 1             | 1.31     | 1                                 | 1                                    |
| nuoN | 79                   | Leu                       | Arg        | 2             | 81.15    | 1                                 | 1                                    |
| nuoN | 128                  | Leu                       | Arg        | 1             | 6.58     | 1                                 | 1                                    |
| nuoN | 229                  | Pro                       | del        | 1             | 98.66    | -                                 | 0                                    |
| nuoN | 230                  | Val                       | Glu        | 1             | 3.11     | 1                                 | 0                                    |
| nuoN | 234                  | Ala                       | Glu        | 3             | 105.02   | 1                                 | 1                                    |
| nuoN | 297                  | Leu                       | Arg        | 14            | 287.79   | 1                                 | 1                                    |
| nuoN | 310                  | Leu                       | Arg        | 2             | 67.32    | 1                                 | 1                                    |
| nuoN | 330                  | Leu                       | Arg        | 1             | 1.46     | 1                                 | 1                                    |
| nuoN | 402                  | Gly                       | Asp        | 6             | 110.56   | 1                                 | 0                                    |

|      |         |           |     |   |        |   |   |
|------|---------|-----------|-----|---|--------|---|---|
| nuoN | 402     | Gly       | Arg | 1 | 3.70   | 1 | 1 |
| nuoN | 424     | Tyr       | Asp | 2 | 46.85  | 1 | 1 |
| nuoN | 474     | Leu       | Arg | 6 | 129.54 | 1 | 1 |
| nuoN | 340-342 | AlaPheGly | del | 4 | 46.61  | - | 1 |
| nuoN | 341-343 | PheGlyVal | del | 1 | 1.33   | - | 1 |

31 Gray entries are mutations that only were detected below 5% frequency in their populations.

32 <sup>1</sup>Mutations from the UTI background were added based on a pairwise alignment to the lab strain background.

33 <sup>2</sup>1=yes, 0=no. Deduced from comparing hydrophobicity values as calculated as done before<sup>3</sup>

34 <sup>3</sup>1=yes, 0=no. Deduced from Protter output<sup>4</sup>

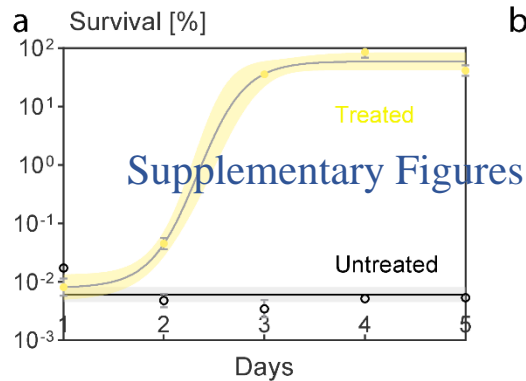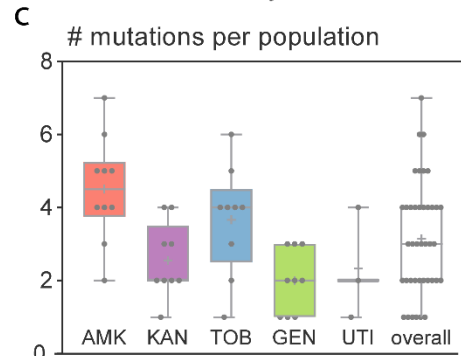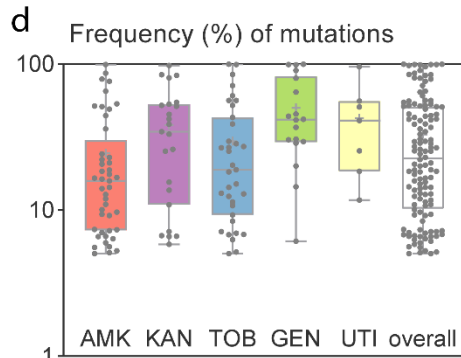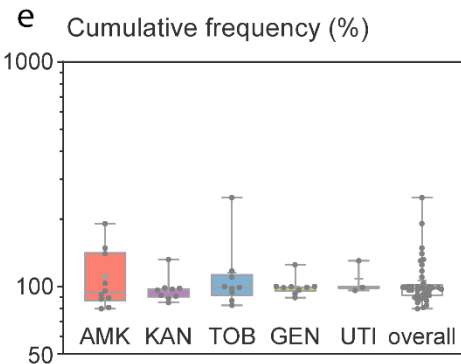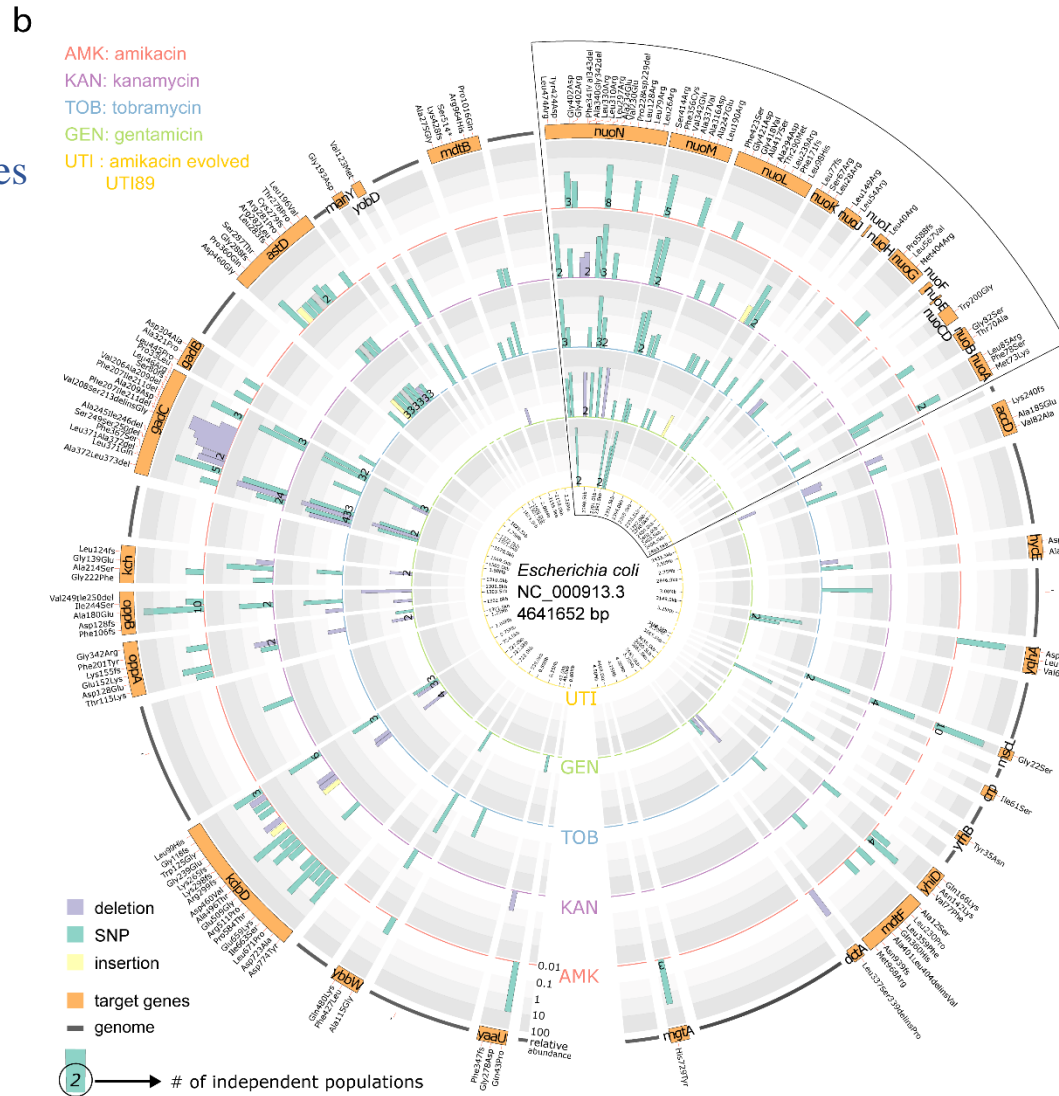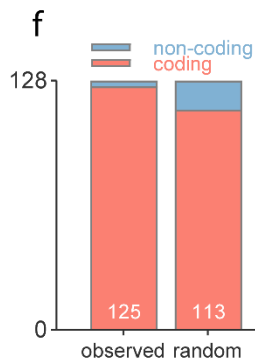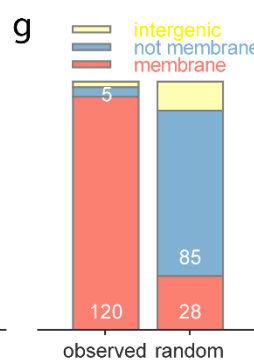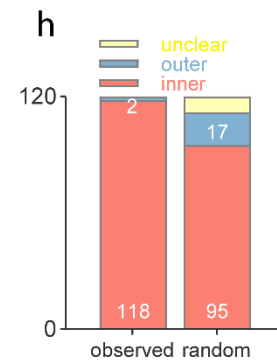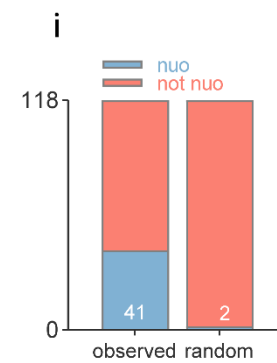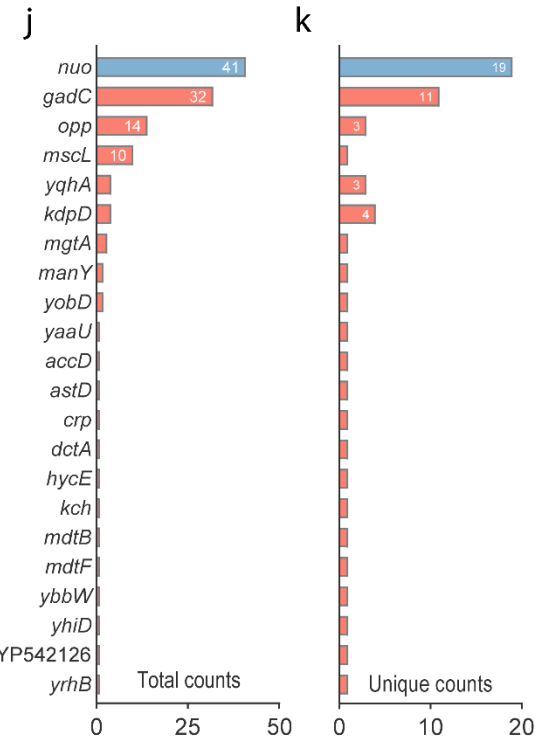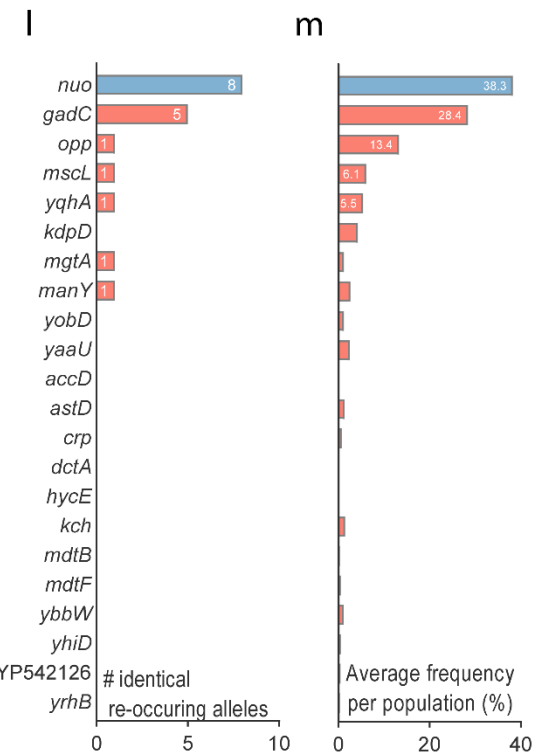

1335 **Supplementary Figure 1 – *E. coli* populations that evolve under daily antibiotic treatment**  
1336 **increase in persistence by acquiring mutations in the *nuo* operon, Related to Fig. 1. a** The number  
1337 of persisters in the uropathogenic strain UTI89 increases during evolutionary adaptation under daily  
1338 amikacin treatments (for 5h at 400  $\mu\text{g ml}^{-1}$ ) as in Fig. 1a (yellow; a model of the spread of a single  
1339 mutation was fitted to the data with 95% shaded confidence interval; means  $\pm$ sems, n=3). Evolution  
1340 without antibiotic treatment (black) has no effect on the persistence level as a horizontal line with a  
1341 slope = 0 fits better to the data than a straight line with slope  $\neq$  0 (F test; with 95% shaded confidence  
1342 interval). For details on fittings, see Methods. **b** A circos plot visualizes mutations that emerged in all  
1343 populations evolved under Fig. 1a. The concentric circles show the average frequency of mutations in  
1344 populations evolved on different antibiotics and in populations of the uropathogenic strain UTI89  
1345 evolved in **a**. Formatting is as in Fig. 1b. The insert highlights the *nuo* operon which is enlarged in Fig.  
1346 1b. **c-e** Statistics of **c** number of mutations, **d** frequency of mutations and **e** cumulative frequency in  
1347 each population per used antibiotic, for the UTI89 populations and overall. Data of ten (amikacin), nine  
1348 (kanamycin, tobramycin, and gentamicin) and three (UTI89) evolved populations were cumulated with  
1349 the number of mutations as in Supplementary Data 1. Boxes extend from the 25<sup>th</sup> to 75<sup>th</sup> percentile with  
1350 a line at median and with whiskers showing min and max. Cumulative frequencies lie around 100%  
1351 which further indicates that the wild type has almost been fully replaced by mutants, also given the fact  
1352 clones seldomly carry more than 1 mutation and clones without mutations were not found (see  
1353 Supplementary Table 1). Populations with a cumulative frequency above 100% likely contain double  
1354 mutants while cumulative frequencies below 100% indicate undetected minor alleles or a remaining  
1355 low percentage of wild types. Boxes show 25-75<sup>th</sup> percentiles (edges), median (line) and min and max  
1356 (whiskers). **f-i** Statistically significant enrichment ( $p < 0.0$  of mutations in **f** coding regions, genes coding  
1357 for **g** membrane proteins and specifically for **h** inner membrane proteins and in **i** the *nuo* operon (for **f**-  
1358 **i**,  $p < 0.05$  based on Chi<sup>2</sup> comparisons to random mutations, see Methods). Numbers in the bars show  
1359 the number of events for the largest (and second largest) groups. The random null hypothesis was  
1360 generated by assuming random chance of mutation across the genome with corrections for the sizes of  
1361 the respective groups. **j-m** Statistics per target gene (in red) across populations to show that *nuo* (in  
1362 blue) is the main evolutionary target with **j** the total mutation events, **k** the number of unique mutations,

1363 **l** the number of different, re-occurring identical alleles and **m** the average cumulative frequency of all  
1364 mutations per target per population. **b** and **m** were generated using both the mutations above 5% and  
1365 those in identified targets below 5% of frequency while **c-l** use only mutations with a frequency above  
1366 5%. Source data are provided as a Source Data file.



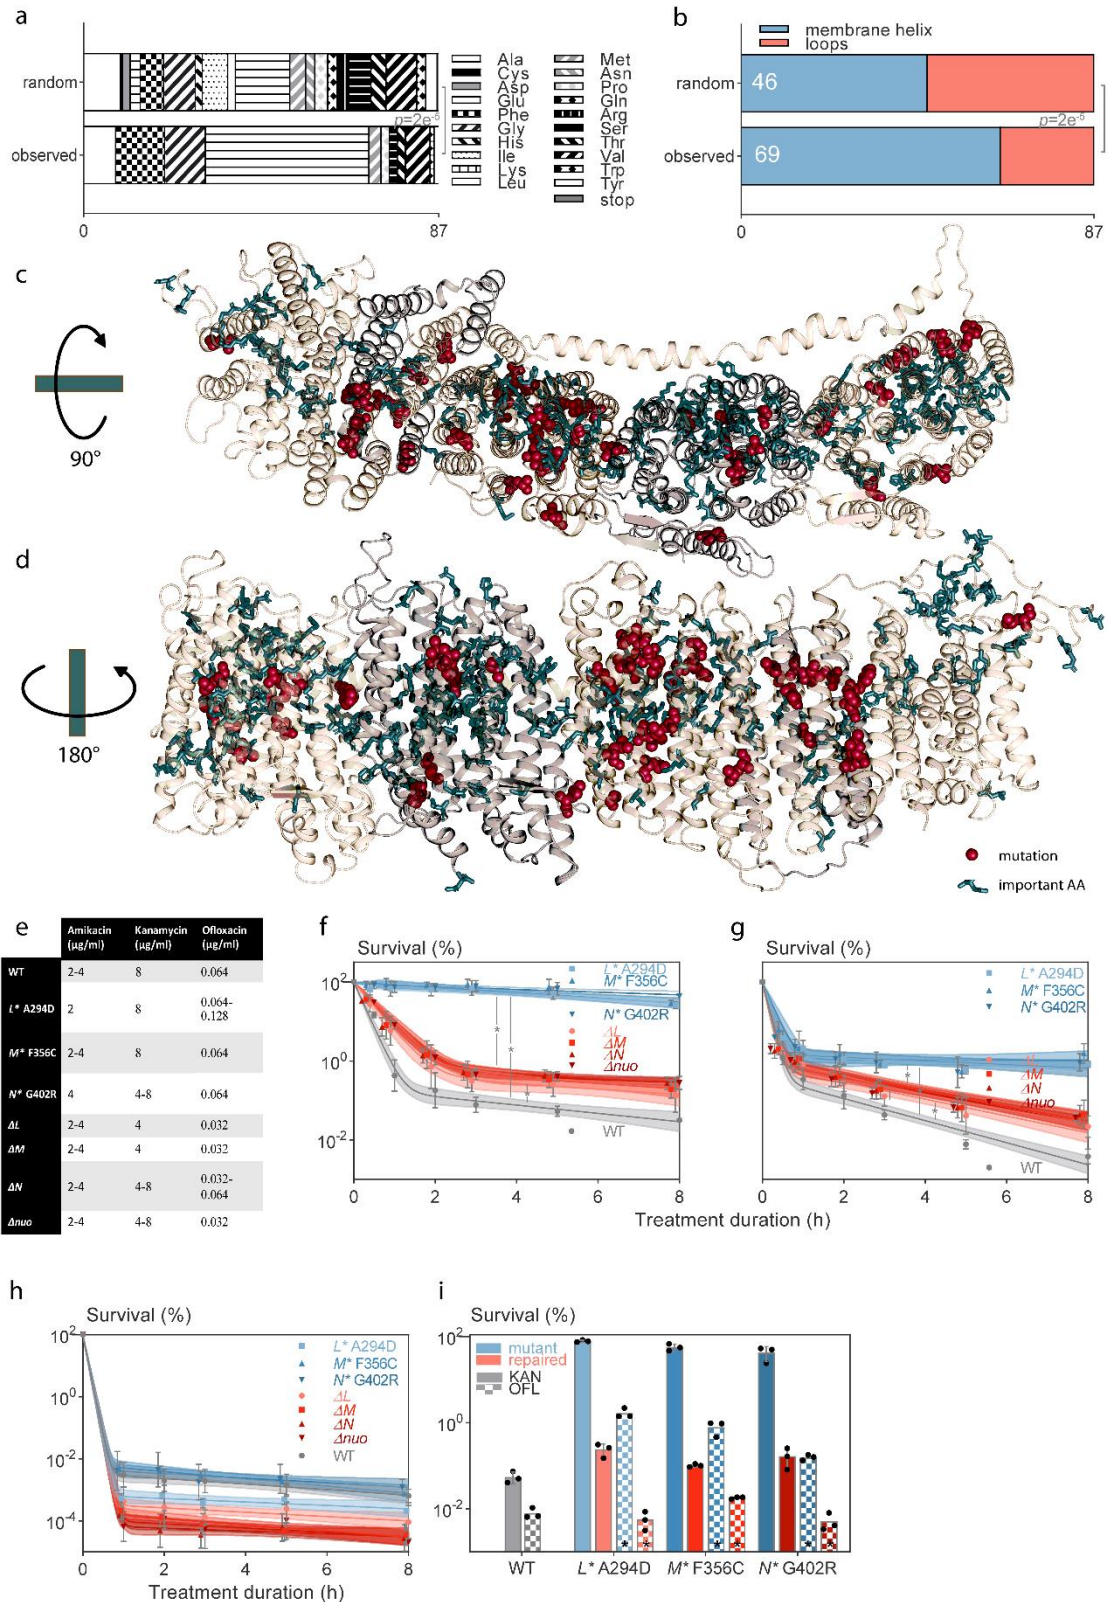

1367 **Supplementary Figure 2 – Mutations in genes encoding membrane subunits of *nuo* are highly**  
 1368 **specific and cause multidrug tolerance without increased resistance, Related to Fig. 2. a and b** The  
 1369 identified mutations in *nuoAHJKLMN* hit specific amino acids **a** which are predominantly part of  
 1370 membrane-spanning helices **b** (from Chi<sup>2</sup> comparisons to random mutations, see Methods). **c** and **d**

1371 Different orientations of the magnified membrane part of the inset in Fig. 2a, with a view from the  
1372 bottom (**c**; 90° upward rotation) and behind (**d**; 180° rightward rotation) with high persister variants  
1373 (red spheres) and important residues for the functioning of the H<sup>+</sup>-pathways (blue sticks) (from  
1374 Baradaran et al., 2013; Efremov and Sazanov, 2011; Di Luca et al., 2017<sup>19-21</sup>). **e** Minimum inhibitory  
1375 concentrations for all mutants and antibiotics show that increased resistance does not explain the  
1376 increased survival in these mutants. **f-h** Killing dynamics show cross-tolerance of the mutants towards  
1377 **f** kanamycin (400 µg ml<sup>-1</sup>) and **g** ofloxacin (5 µg ml<sup>-1</sup>) in stationary phase while knockout mutants in a  
1378 single gene or the entire operon (in red) only show marginal increase in persistence and **h** tolerance  
1379 towards ofloxacin in exponential phase (5 µg ml<sup>-1</sup>) is not increased. A model describing biphasic killing  
1380 dynamics (95% shaded confidence interval) was fitted to the data (means ±stdevs, n=3; \* fits of groups  
1381 are different based on AIC criterion). **i** As for amikacin tolerance in Fig. 2e, tolerance to kanamycin (5h  
1382 at 400 µg ml<sup>-1</sup>; full bars) and ofloxacin (5h at 5 µg ml<sup>-1</sup>; hatched bars) is lost when mutations in subunits  
1383 L, M and N are genomically repaired (red bars) (mean ±stdevs, n=3; \* in the bars: *p*<0.0001 three-way  
1384 ANOVA with Tukey's test to the unrepaired strain). Source data are provided as a Source Data file.

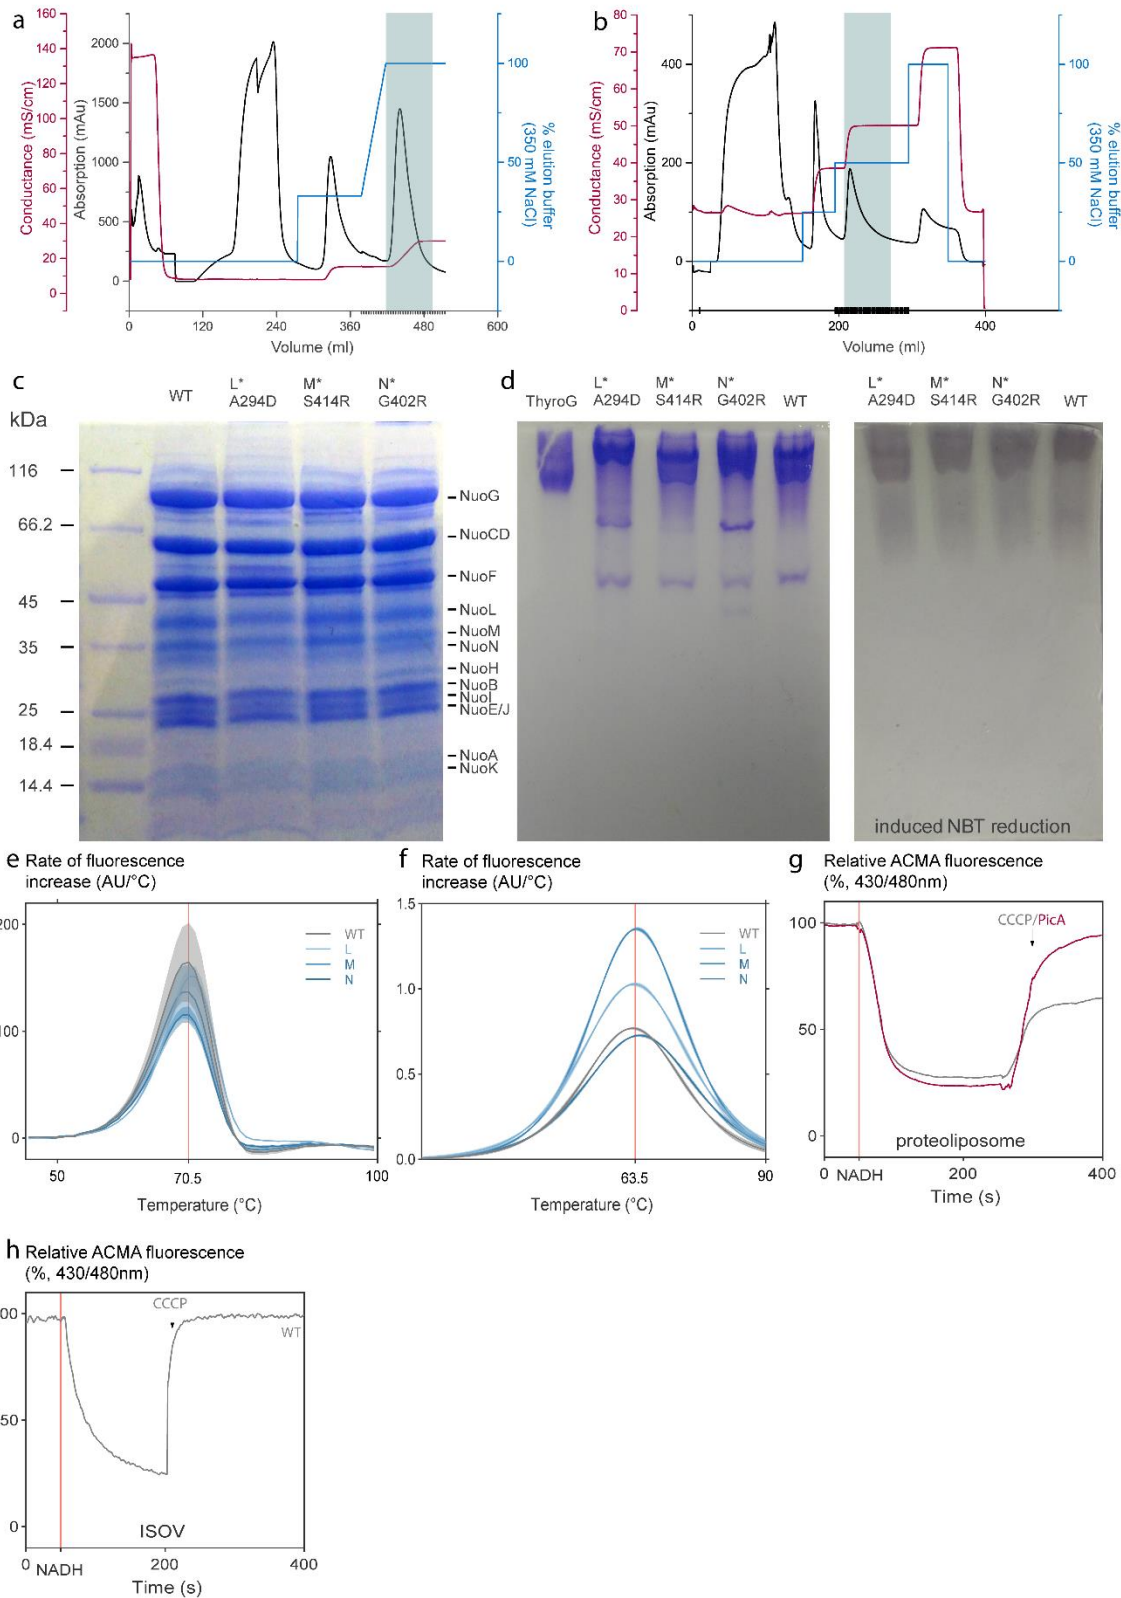

1385

1386 **Supplementary Figure 3 – High persistence-conferring variants of NuoL, M and N were purified**

1387 **as intact, stable complex I with similar NADH oxidase activity as the wild type, Related to Fig. 3.**

1388 **a and b** The main chromatographic steps used in the purification of complex I and its variants are a

1389 anion exchange chromatography on a Fractogel EMD TMAE Hicap (Merck) and **b** affinity  
1390 chromatography for the His<sub>6</sub>-tag labelled complex I on Ni-IDA material (Invitrogen) (see Methods).  
1391 Representative chromatographs are shown. Boxed regions indicate NADH/ferricyanide oxidoreductase  
1392 active fractions that were pooled and taken along in the purification. Small ticks on the x axis show the  
1393 fractions that were sampled. **c** and **e** Gel separation of purified complex I using a **c** denaturing SDS  
1394 PAGE (75 µg) and **d** Clear-native PAGE (CN-PAGE) (40 µg). **c** After Coomassie staining, variants and  
1395 wild type show similar band patterns of subunits (bands were assigned to individual units based on size  
1396 comparison on the right). Left lane contains Pierce unstained protein marker (Thermo Scientific). **d** The  
1397 majority of the purified complexes remains stable upon purification (left, highly dense Coomassie-blue  
1398 bands on the top; Thyroglobulin is added in the first lane as size comparison on this native, non-  
1399 denaturing, gel) and is capable of *in situ* reduction of the dye NBT by NADH oxidation (right gel, strong  
1400 black signal on the top) (gels in **c** and **d** are run once). **e** and **f** Stability of the purified complexes was  
1401 further confirmed by “melting point” determination based on **e** the release of autofluorescent flavin  
1402 mononucleotide, the catalytic co-factor of complex I, and **f** the binding of CPM, which increases in  
1403 fluorescence upon reaction with thiol groups (of cysteines) that are released upon heating and unfolding.  
1404 In **e** and **f** the first-order derivatives are shown (means  $\pm$ sems error bands, n=3). “Melting points” are  
1405 identified as peaks and shown by a vertical red line and number. **g** and **h** The ACMA quench in  
1406 proteoliposomes or ISOVs (Fig. 3c, d) is a measure of the proton gradient generated by complex I. In  
1407 proteoliposomes of wild-type complex I **g** the fluorescence quench is reverted by adding either the  
1408 uncoupler CCCP (gray) or the specific complex I inhibitor piericidin A (red). CCCP does not fully  
1409 revert the quench as CCCP itself contributes to the measured fluorescence in this assay. The  
1410 experimental conditions were the same as in Fig. 3c. **h** For ISOVs containing wild-type complex I, the  
1411 ACMA quench of the IMV is fully reverted by the uncoupler CCCP. With the substantially higher  
1412 protein concentration in the assay than in **g**, the fluorescence of CCCP is not detectable. The  
1413 experimental conditions were the same as in Fig. 3d. Source data are provided as a Source Data file.

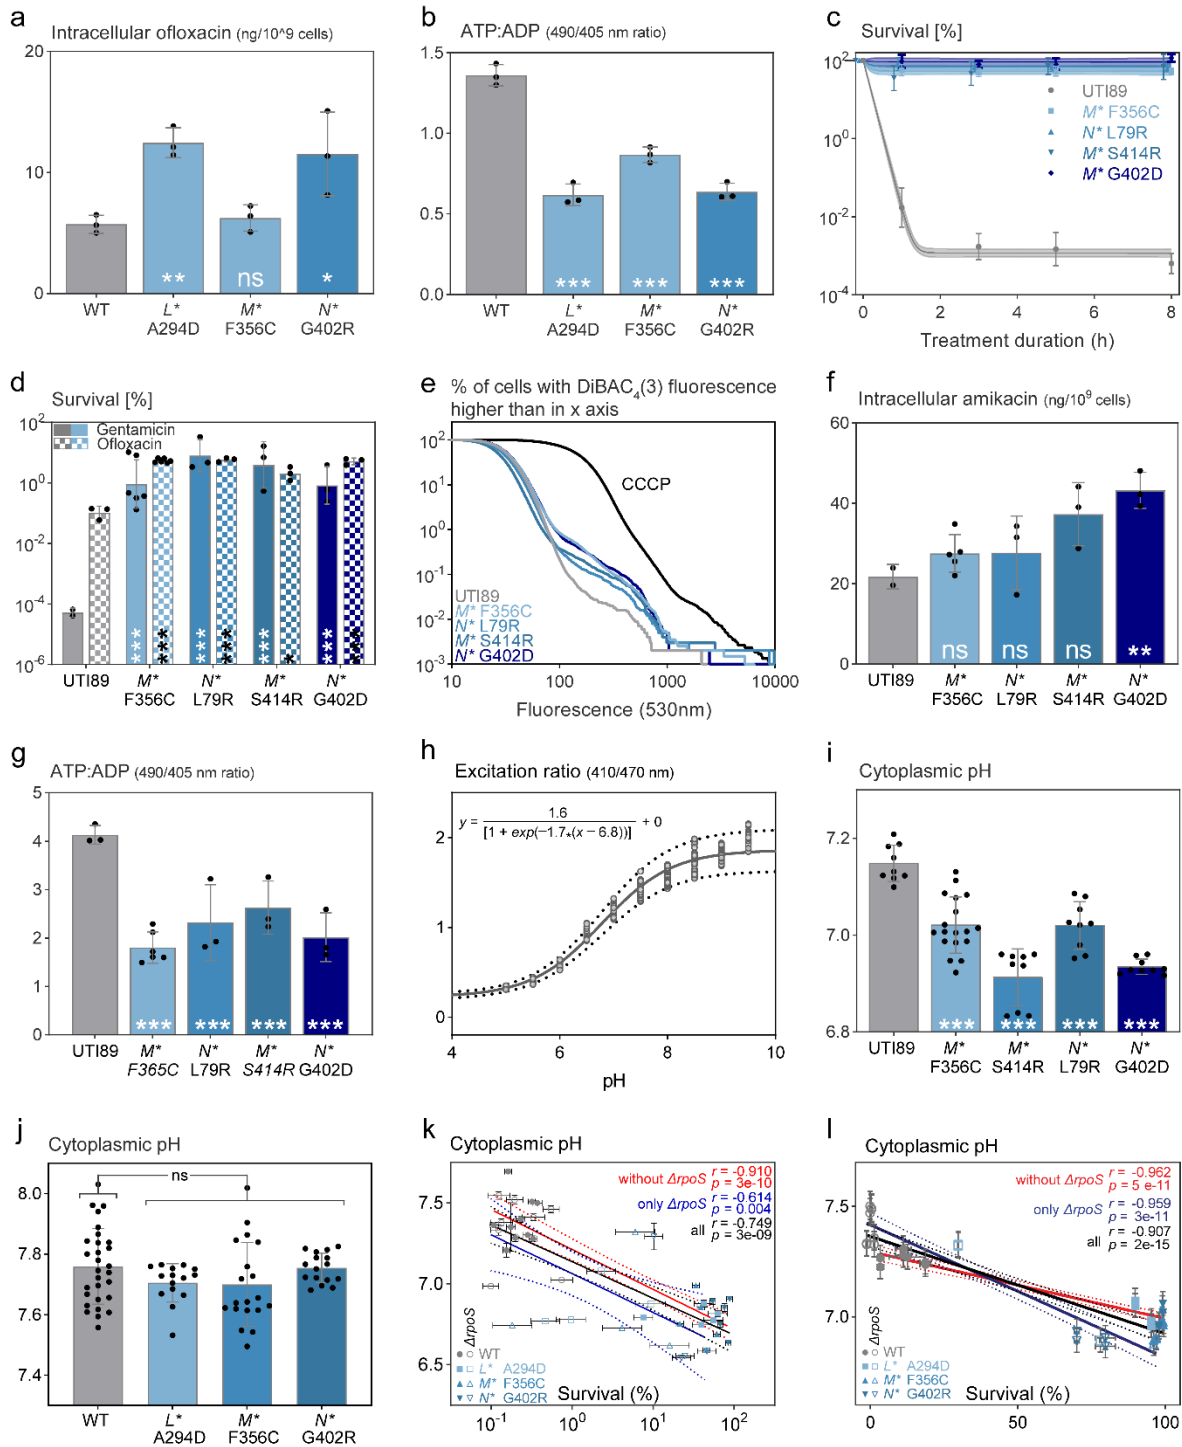

1414

1415 **Supplementary Figure 4 – Increased persistence in the identified *nuo* mutants does not depend**

1416 **on impaired antibiotic uptake or a decreased energy status, Related to Fig. 4-6. a Uptake of**

1417 ofloxacin is not decreased in the *nuo* mutants. Furthermore, a decreased uptake through decreased PMF

1418 would not explain the multidrug tolerance to this class of antibiotics as the uptake of fluoroquinolones

1419 is not powered by PMF (means  $\pm$ stdevs, n=3; \*\*  $p < 0.01$  and \*  $p < 0.05$  of a one-way ANOVA model

1420 with Dunnett's multiple comparisons test to the wild type). **b** The ATP:ADP ratio in exponential phase  
1421 is significantly decreased in all mutants in *nuo* as measured in populations by fluorescent ratiometry  
1422 after expressing the ATP-sensitive fluorophore Perceval (means  $\pm$ stdevs,  $n=3$ ; \*\*\*\*  $p<0.0001$  of a one-  
1423 way ANOVA model with Dunnett's multiple comparisons test to the wild type). **c-g** and **i** Measurements  
1424 on *nuo* mutants in the UTI89 background showing **c** increased persistence for amikacin ( $400 \mu\text{g ml}^{-1}$ )  
1425 during a time-kill curve (a biphasic killing model  $\pm 95\%$  shaded confidence interval was fitted to the  
1426 data;  $n=3$ ), **d** cross tolerance to a 5 hour treatment with gentamicin ( $400 \mu\text{g ml}^{-1}$ ) and ofloxacin ( $5 \mu\text{g}$   
1427  $\text{ml}^{-1}$ ) ( $n\geq 3$ ), **e** minor changes in electric potential as measured by the uptake of DiBAC<sub>4</sub>(3), a potential-  
1428 sensitive fluorescent dye, assessed on the single-cell level using flow cytometry (the 100% - cumulative  
1429 distribution is plotted in function of fluorescence showing which fraction of the population has a  
1430 fluorescence higher than the  $x$  value), **f** an unchanged amikacin uptake as measured by a bioassay, **g** a  
1431 significant decrease of the ATP:ADP ratio in stationary phase assessed with Perceval and **i** a significant  
1432 internal acidification at stationary phase measured using pHluorin. For **c-d**, **f-g** and **i**, means  $\pm$ stdevs,  
1433  $n=3$  and for **e** one representative repeat of distributions are shown for  $n=2$ . For **d**, \*  $p<0.05$ , and \*\*\*  
1434  $p<0.0001$  from a two-way ANOVA model with Dunnett's multiple comparisons test to the wild type.  
1435 For **f**, **g**, **i**, \*\*  $p<0.01$ , \*\*\*  $p<0.001$  from a one-way ANOVA model with Dunnett's multiple  
1436 comparisons test to the wild type. **h** Example of calibration curve for pH calculations. *E. coli* cells  
1437 expressing pHluorin were washed and resuspended in M63 minimal salts medium at different pH values  
1438 containing 40 mM benzoate and 40 mM methylamine. Next, the Boltzmann equation (line  $\pm 95\%$  PI,  
1439  $n=48$ ) was fitted to the excitation ratio (410/470nm) data and used as calibration curve. **j** *nuo*\* mutants  
1440 in the lab strain in exponential phase with an external pH of 7.12 do not show general internal  
1441 acidification as they do in stationary phase (Fig. 5a; means  $\pm$ stdevs,  $n=3$ ; ns = non-significant for a  
1442 phenotype-level comparison from a mixed-effects model). **k** and **l** Cytoplasmic pH shows significant  
1443 negative correlation with survival of amikacin treatment ( $400 \mu\text{g ml}^{-1}$ ) both in **k** stationary phase and **l**  
1444 30 min after the shift from glucose to fumarate, regardless of whether all strains (black) or only strains  
1445 with/without functional *rpoS* (red/blue; closed/open symbols) are considered (linear regressions  $\pm 95\%$   
1446 CIs, Pearson  $r$  and  $p$  values in top right corner; means  $\pm$ sems,  $n\geq 4$ ). **l** Shows the data of strains with

1447 functional *rpoS* from Fig. 5c for visual comparison and correlates survival to the cytoplasmic pH at 220  
1448 min after the switch (means  $\pm$ sems,  $n \geq 6$ ). Source data are provided as a Source Data file.

1449



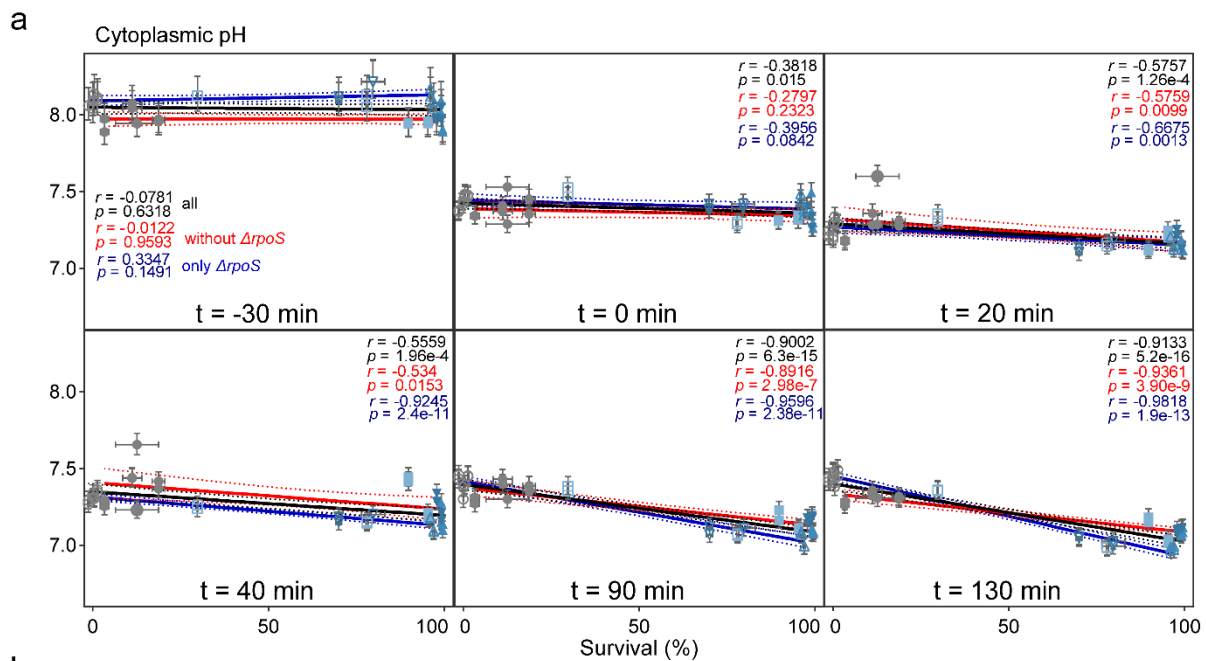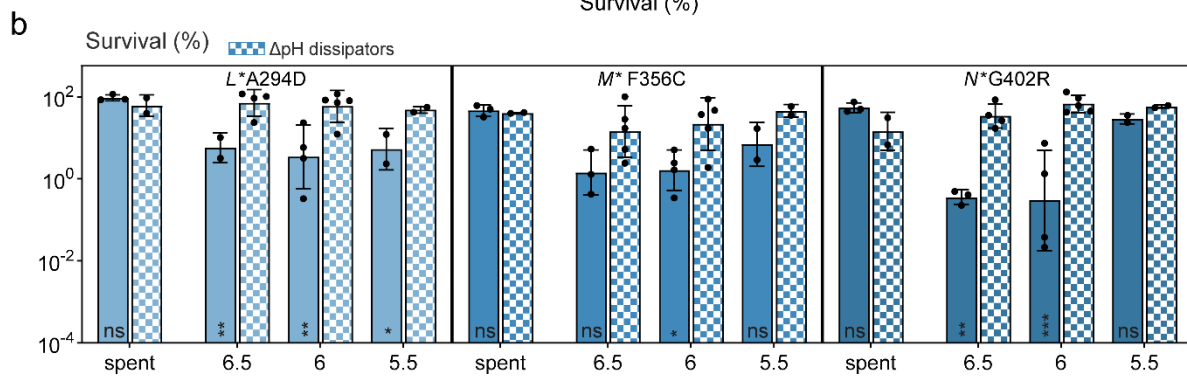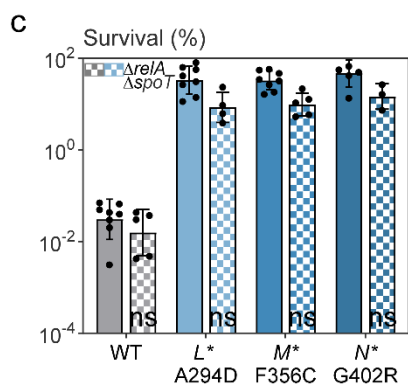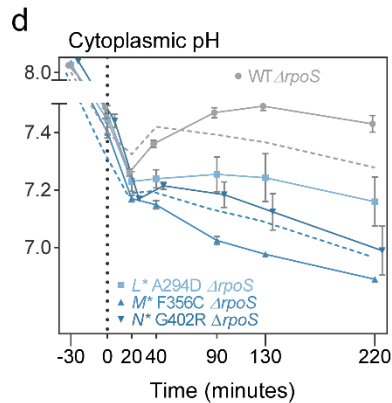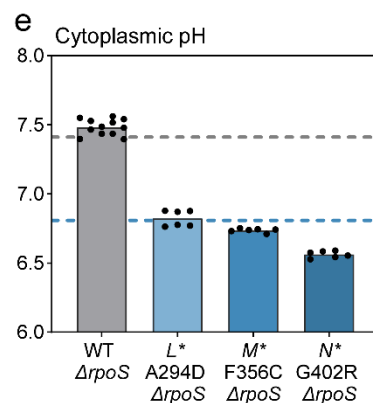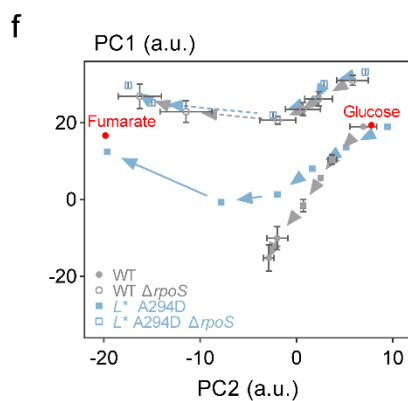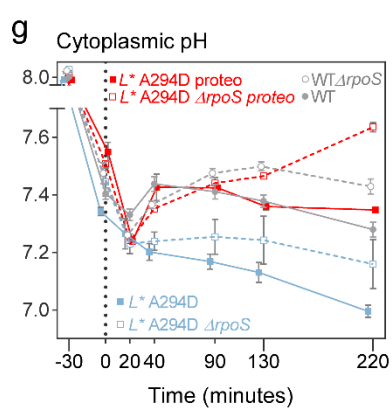



1451 **Supplementary Figure 5 – Intracellular acidification underlies increased persistence in *nuo***  
1452 **mutants, Related to Fig. 4-6. a** Survival of amikacin treatment (4h at 400  $\mu\text{g ml}^{-1}$ ) 30 min after the  
1453 shift from glucose to fumarate negatively correlates significantly with cytoplasmic pH, starting from  
1454 20-40 min after the switch with correlations becoming stronger at later time points. Before (at -30 min  
1455 or 0 min), correlations are non-significant or weak. The correlations are present regardless of whether  
1456 all strains (black) or only strains with/without functional *rpoS* (red/blue; closed/open symbols) are  
1457 considered (linear regressions  $\pm 95\%$  CIs, Pearson *r* and *p* values in corners; means  $\pm$ sems,  $n \geq 6$ ). **b** As  
1458 in the wild type (Fig. 5d), cytoplasmic acidification (boxed bars with  $\Delta\text{pH}$  dissipators benzoate and  
1459 methylamine at 40 mM) increased the survival of amikacin treatment (5h at 400  $\mu\text{g ml}^{-1}$ ) in each of the  
1460 *nuo*\* mutants. Given the already high persister level of the *nuo*\* mutants, the effect of cytoplasmic  
1461 acidification was much more modest than in the wild type. Adding this weak acid-base pair does not  
1462 influence tolerance levels in unbuffered spent medium (means  $\pm$ stdevs,  $n \geq 2$ ; \*  $p < 0.05$ , \*\*  $p < 0.01$ , \*\*\*  
1463  $p < 0.001$ , and ns = non-significant for within-strain comparisons between presence/absence of dissipator  
1464 for each pH<sub>e</sub> from a mixed-effects model with Šídák's posttest). **c** The increased persistence of the *nuo*\*  
1465 mutants (5h amikacin treatment at 400  $\mu\text{g ml}^{-1}$ ) is independent of the alarmone (p)ppGpp as a knockout  
1466 of *relA* and *spoT* has in non-significant effect (means  $\pm$ stdevs,  $n \geq 3$ ; ns = non-significant for within-  
1467 strain comparison from a mixed-effects model). **d** and **e** The cytoplasmic pH of strains lacking *rpoS* is  
1468 similar to pH of strains with *rpoS* **d** during a shift from glucose to fumarate and **e** in stationary phase.  
1469 The average cytoplasmic pH of the wild type (gray) and all *nuo*\* mutants together (blue) are added as  
1470 dotted lines as comparison in both plots (for **d**, means  $\pm$ stdevs,  $n \geq 4$ ; for **e**, means,  $n \geq 6$ ). **f** and **g** A  
1471 deviating experimental run with the *nuoL*\* mutants further substantiates our findings on how  
1472 cytoplasmic acidification leads to antibiotic tolerance by halting proteomic changes. In this particular,  
1473 single run, the *nuoL*\* mutants with and without *rpoS* (in respectively full/empty blue symbols and  
1474 full/dashed lines) shows **f** a shift in proteome that is normal for steady-state growth on fumarate, likely  
1475 because **g** acidification was not strong and persistent the proteome is not blocked and shifts towards a  
1476 proteome. In **f** the wild type is added as comparison (with means  $\pm$ stdevs,  $n = 3$ ). In **g** the deviating  
1477 experimental run of the *nuoL*\* mutants is shown in red and compared to the average *nuoL*\* mutants in  
1478 blue and wild type in gray (means  $\pm$ sems,  $n \geq 4$ ). Source data are provided as a Source Data file.

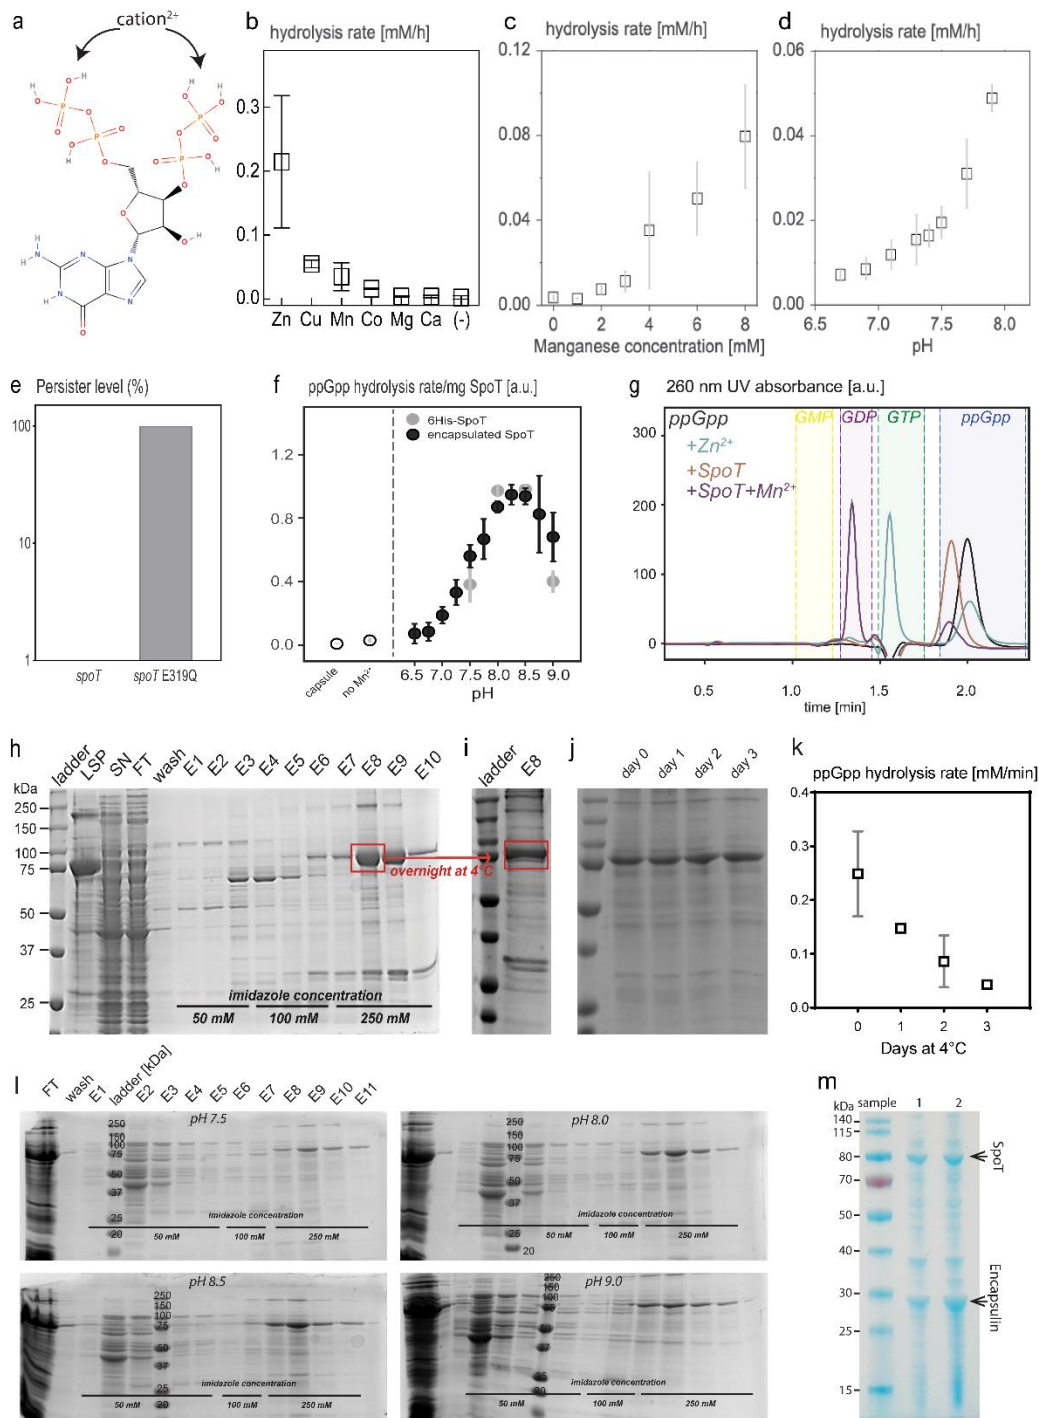

1479

1480 **Supplementary Figure 6 - Rate of spontaneous and SpoT-dependent ppGpp hydrolysis depends**

1481 **on manganese and pH, Related to Fig. 6. a** 2D structure of ppGpp (PubChem) and the potential

1482 divalent cation coordination sites are indicated with arrows. **b-d** Rate of spontaneous hydrolysis (*i.e.*

1483 slope of a linear regression fitted to the time-dependent ppGpp concentration data) is dependent on **b**

1484 type of divalent cation, **c** on the concentration of manganese and **d** on pH. For **b** and **c**, pH = 7.7, with

1485 in **b** concentrations of divalent cations at 1 mM. For **d**, 4 mM manganese was used. All reactions were  
1486 performed at 37°C with an initial ppGpp concentration of 1 mM. At higher pH values than 7.9 we  
1487 observed precipitation of  $Mn^{2+}$ , therefore these data were discarded (means  $\pm$ stdevs,  $n \geq 3$ ). **e** The  
1488 persist level of a strain with wild-type *spoT* does not differ from a strain carrying *spot* E319Q, a SpoT  
1489 variant defective in ppGpp synthesis (means  $\pm$ stdevs,  $n=3$ ;  $p= 0.2005$ , *t*-test). **f** SpoT-dependent ppGpp  
1490 hydrolysis rates determined by the slope of a linear regression fitted to the time-dependent ppGpp  
1491 concentration data in buffers with different pH values. For samples with encapsulated SpoT (purified  
1492 in **l**), rates were normalized to SpoT content in the sample. The reactions with the empty capsule and  
1493 without  $Mn^{2+}$  were performed in reaction buffer at pH 8.0. All reactions were performed at 25°C in the  
1494 presence of 1 mM  $Mn^{2+}$  with an initial ppGpp concentration of 1 mM (means  $\pm$ stdevs,  $n \geq 3$ ). For data  
1495 of regularly purified SpoT, we eluted the protein from the Ni-Sepharose directly with buffers adjusted  
1496 to the corresponding pH values due to low SpoT concentration and the significant loss of protein during  
1497 buffer exchange. Here, only buffers between pH 7.5 and 9.0 could be used as the elution efficiency is  
1498 pH dependent and 6His-SpoT only eluted at these pH values (**l**). **g** SpoT-dependent ppGpp hydrolysis  
1499 critically needs manganese and results in GDP whereas spontaneous hydrolysis using metal ions results  
1500 in GTP. HPLC-UV chromatograms with GMP, GDP, GTP and ppGpp standards (shades), ppGpp in  
1501 buffer (black), spontaneous ppGpp hydrolysis in buffer in the presence of 4 mM  $Zn^{2+}$  (blue), ppGpp in  
1502 presence of SpoT without (brown) and with  $Mn^{2+}$  (purple), respectively. The chromatograms were  
1503 corrected by subtracting the UV signal of the corresponding buffer injections. **h-m** Purification of SpoT  
1504 at different pH values and through encapsulation. **h** Purification of 6His-SpoT in Tris buffer, eluted  
1505 from the Ni-Sepharose column by increasing imidazole concentrations. (LSP: low-speed pellet, SN:  
1506 supernatant after low-speed centrifugation, FT: flow through, E1-10: elution fraction). **i** A sample of  
1507 E8 was kept at 4°C overnight showing a  $\pm 50\%$  degradation. **j** 6His-SpoT purified in cytosolic buffer  
1508 remained stable at 4°C for four days. For **i** and **j**, the same size marker was used in the first lane as in  
1509 **h**. For **h-j** and **l**, 20  $\mu$ l of the samples were loaded on a 12% SDS gel and stained with Brilliant Blue  
1510 G250. **k** ppGpp hydrolysis rates (at 25°C in 1 mM  $MnCl_2$ ; slope of a linear regression of the time-  
1511 dependent ppGpp concentration) by 6His-SpoT decreased over the four days at 4°C. The reaction was  
1512 started by ppGpp (1 mM) and at different time points samples were taken and mixed with 10 mM EDTA

1513 to stop the reaction (means  $\pm$ stdevs, n=2). **l** 6His-SpoT was eluted as in **h** with elution buffers adjusted  
1514 to pH 7.5, pH 8.0, pH 8.5 and 9.0. **m** Encapsulin-SpoT is co-expressed and purified (see Methods). 3  
1515  $\mu$ l were used for SDS PAGE which indicates that SpoT (~80 kDa) has been co-purified with encapsulin  
1516 (~29 kDa). All gels in **h-j** and **l-m** were run once. Shown are preparations from two independent samples  
1517 ( $\pm 3$  mg ml<sup>-1</sup>). Source data are provided as a Source Data file.

1518

1519

## 1520 Supplementary References

- 1521 1. Van den Bergh, B. *et al.* Frequency of antibiotic application drives rapid evolutionary  
1522 adaptation of *Escherichia coli* persistence. *Nat. Microbiol.* **1**, 16020 (2016).
- 1523 2. Keseler, I. M. *et al.* The EcoCyc database: Reflecting new knowledge about *Escherichia coli* K-  
1524 12. *Nucleic Acids Res.* **45**, D543–D550 (2017).
- 1525 3. Zhao, G. & London, E. An amino acid “transmembrane tendency” scale that approaches the  
1526 theoretical limit to accuracy for prediction of transmembrane helices: Relationship to biological  
1527 hydrophobicity. *Protein Sci.* **15**, 1987–2001 (2006).
- 1528 4. Omasits, U., Ahrens, C. H., Müller, S. & Wollscheid, B. Protter: Interactive protein feature  
1529 visualization and integration with experimental proteomic data. *Bioinformatics* **30**, 884–886  
1530 (2014).
- 1531 5. Chen, S. L. *et al.* Identification of genes subject to positive selection in uropathogenic strains of  
1532 *Escherichia coli*: a comparative genomics approach. *Proc. Natl. Acad. Sci. U. S. A.* **103**, 5977–  
1533 5982 (2006).
- 1534 6. Gndandt, E., Schimpf, J., Harter, C., Hoerer, J. & Friedrich, T. Reduction of the off-pathway iron-  
1535 sulphur cluster N1a of *Escherichia coli* respiratory complex I restrains NAD<sup>+</sup> dissociation. *Sci.*  
1536 *Rep.* **7**, 8754 (2017).
- 1537 7. Datsenko, K. A. & Wanner, B. L. One-step inactivation of chromosomal genes in *Escherichia coli*  
1538 K-12 using PCR products. *Proc. Natl. Acad. Sci. U. S. A.* **97**, 6640–5 (2000).
- 1539 8. Bougdour, A. & Gottesman, S. ppGpp regulation of RpoS degradation via anti-adaptor protein  
1540 IraP. *Proc. Natl. Acad. Sci.* **104**, 12896–12901 (2007).
- 1541 9. Amarneh, B., De Leon-Rangel, J. & Vik, S. B. Construction of a deletion strain and expression  
1542 vector for the *Escherichia coli* NADH:ubiquinone oxidoreductase (Complex I). *Biochim. Biophys.*  
1543 *Acta* **1757**, 1557–60 (2006).
- 1544 10. Baba, T. *et al.* Construction of *Escherichia coli* K-12 in-frame, single-gene knockout mutants:  
1545 the Keio collection. *Mol. Syst. Biol.* **2**, 2006.0008 (2006).
- 1546 11. Xiao, H. *et al.* Residual guanosine 3',5'-bispyrophosphate synthetic activity of *relA* null mutants  
1547 can be eliminated by *spoT* null mutations. *J. Biol. Chem.* **266**, 5980–5990 (1991).
- 1548 12. Schmidt, A. *et al.* The quantitative and condition-dependent *Escherichia coli* proteome. *Nat.*  
1549 *Biotechnol.* **34**, 104–110 (2016).
- 1550 13. Radzikowski, J. L. *et al.* Bacterial persistence is an active  $\sigma^S$  stress response to metabolic flux  
1551 limitation. *Mol. Syst. Biol.* **12**, 882 (2016).
- 1552 14. Berg, J., Hung, Y. P. & Yellen, G. A genetically encoded fluorescent reporter of ATP:ADP ratio.  
1553 *Nat. Methods* **6**, 161–6 (2009).
- 1554 15. Wilmaerts, D. *et al.* The persistence-inducing toxin HokB forms dynamic pores that cause ATP  
1555 leakage. *MBio* **9**, 1–12 (2018).
- 1556 16. Pohl, T., Uhlmann, M., Kaufenstein, M. & Friedrich, T. Lambda Red-mediated mutagenesis and  
1557 efficient large scale affinity purification of the *Escherichia coli* NADH:ubiquinone  
1558 oxidoreductase (complex I). *Biochemistry* **46**, 10694–702 (2007).
- 1559 17. Lončar, N., Rozeboom, H. J., Franken, L. E., Stuart, M. C. A. & Fraaije, M. W. Structure of a robust

- 1560 bacterial protein cage and its application as a versatile biocatalytic platform through enzyme  
1561 encapsulation. *Biochem. Biophys. Res. Commun.* **529**, 548–553 (2020).
- 1562 18. Martinez, K. a *et al.* Cytoplasmic pH response to acid stress in individual cells of *Escherichia coli*  
1563 and *Bacillus subtilis* observed by fluorescence ratio imaging microscopy. *Appl. Environ.*  
1564 *Microbiol.* **78**, 3706–3714 (2012).
- 1565 19. Baradaran, R., Berrisford, J. M., Minhas, G. S. & Sazanov, L. A. Crystal structure of the entire  
1566 respiratory complex I. *Nature* **494**, 25–30 (2013).
- 1567 20. Efremov, R. G. & Sazanov, L. A. Structure of the membrane domain of respiratory complex I.  
1568 *Nature* **476**, 414–20 (2011).
- 1569 21. Di Luca, A. *et al.* Symmetry-related proton transfer pathways in respiratory complex I. *Proc.*  
1570 *Natl. Acad. Sci.* **114**, E6314–E6321 (2017).
- 1571
