# Supplementary material for: Mutations in respiratory complex I promote antibiotic persistence through alterations in intracellular acidity and protein synthesis
Source: PubMed Central journal article supplement (PMC8795404; doi:10.1038/s41467-022-28141-x), 2022-01-27
Supplement: 41467_2022_28141_MOESM3_ESM.pdf [file 41467_2022_28141_MOESM3_ESM.pdf]

## Description of Additional Supplementary Files

**Supplementary Data 1:** Mutations >5% in populations of *E. coli*, evolved under recurrent aminoglycoside treatment to high persistence.

<sup>1</sup>Naming is as follows: the first abbreviation denotes the antibiotic that was used during the evolution experiments and the number indicates the population.

<sup>2</sup>Location with regards to the used reference for *E. coli* K12 MG1655 NC\_000913.

**Supplementary Data 2:** Mutations <5% that target the main targets identified before in populations of *E. coli*, evolved under recurrent aminoglycoside treatment to high persistence.

Here, only the target genes identified in Supplementary Data 1 were analyzed for low frequency mutations without any cut-off frequency (thereby potentially containing false positives), supplemented with genes that locate in the same operon if a clear operon structure was available on EcoCyc2. The full list of genes grouped in operons: *nuoABCDCDEFGHIJKLMN*, *mscL*, *yaaU*, *yqhA*, *kdpDE*, *astABCDE*, *oppABCD*, *gadBC*, *yhiD*, *dctA*, *kch*, *yobD*, *accD*, *ybbW-glxK-ybbY-allB-glxR-hyi-gcl*, *hycABCDEFGH*, *yrhB*, *mdtABCD-baeSR*, *mdtEF*, *crp*, *manXYZ*, *mgtA*.

<sup>1</sup>Naming is as follows: the first abbreviation denotes the antibiotic that was used during the evolution experiments and the number indicates the population.

<sup>2</sup>Location with regards to the used reference for *E. coli* K12 MG1655 NC\_000913.3.

**Supplementary Data 3:** Key resources produced and/or used in this study.

**Supplementary Data 4:** Primers used in this study.
